# Supplementary material for: BATF alleviates ox-LDL-induced HCAEC injury by regulating SIRT1 expression in coronary heart disease
Source: PubMed Central journal article supplement (PMC11649077; doi:10.1371/journal.pone.0306514), 2024-12-16

Figure 4B\_BATF\_HCAEC\_13.75kDa

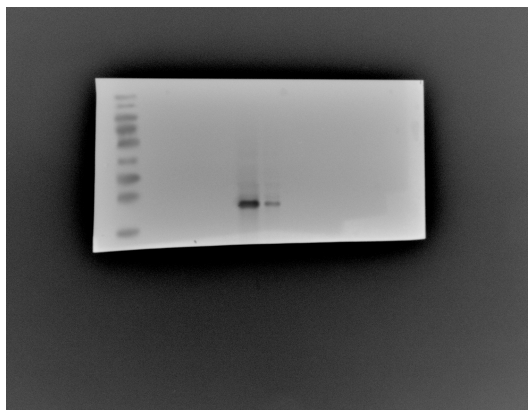

Figure 4B\_GAPDH\_HCAEC\_36kDa

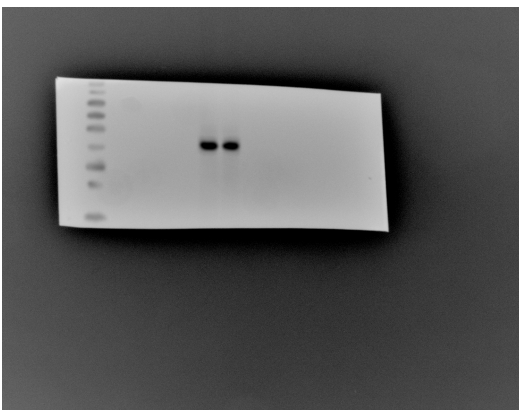

Figure 4F\_Bcl-2\_HCAEC\_26kDa

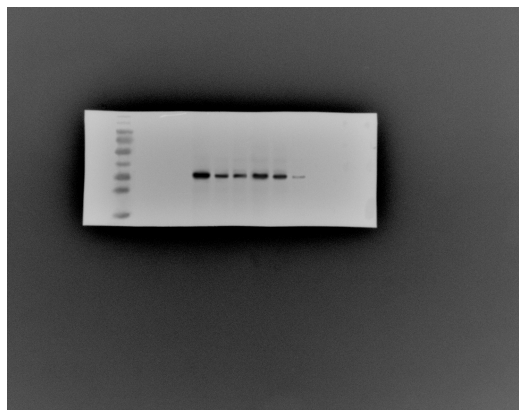

Figure 4F\_Bax\_HCAEC\_18kDa

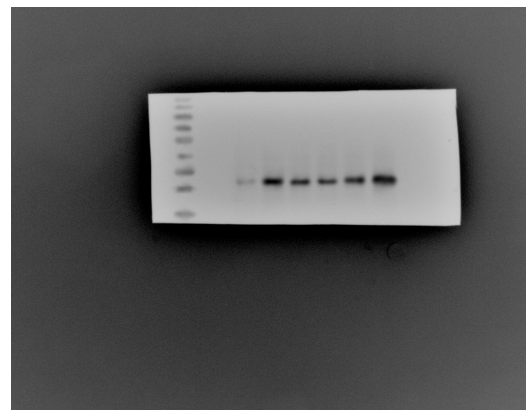

Figure 4F\_GAPDH\_HCAEC\_36kDa

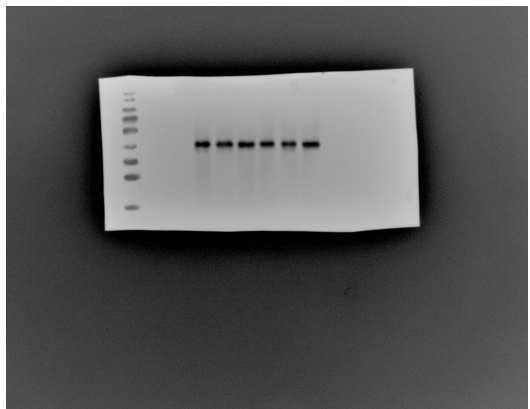

Figure 5B\_SIRT1\_HCAEC\_110kDa

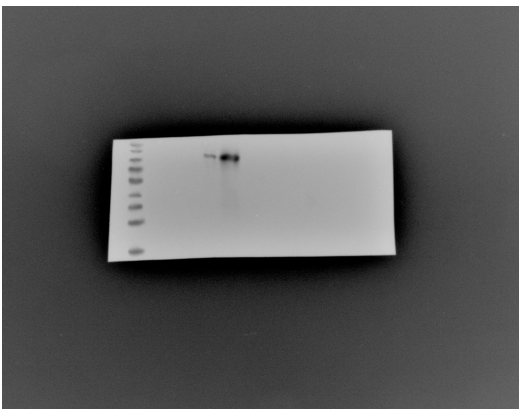

Figure 5B\_GAPDH\_HCAEC\_36kDa

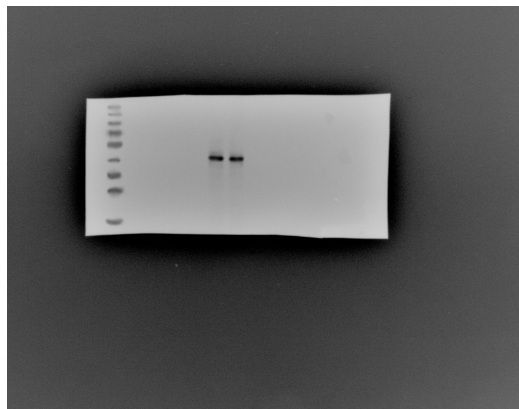

Supplement: pone.0306514.s001.pdf [file pone.0306514.s001.pdf]
